# Supplementary material
Source: publisher figshare collection journal article supplement (https://acs.figshare.com/ndownloader/files/12172265)
Supplement: Supplementary file 1 [file 12172265]

# ELECTRONIC SUPPLEMENTARY MATERIAL

for

## Biodiesel production *via trans*-esterification using *Pseudomonas cepacia* immobilized on cellulosic polyurethane

*Li Li,<sup>a,b</sup> Philip W. Dyer,<sup>a,b</sup> and H. Christopher Greenwell<sup>a,c,\*</sup>*

a. Centre for Sustainable Chemical Processes, Department of Chemistry, Durham University, South Road, Durham, DH1 3LE, UK

b. Department of Chemistry, Durham University, South Road, Durham, DH1 3LE, UK

c. Department of Earth Sciences, Durham University, South Road, Durham, DH1 3LE, UK

E-mail address:

Li Li: li.li2@durham.ac.uk

Philip W. Dyer: p.w.dyer@durham.ac.uk

\* Corresponding author:

H. Christopher Greenwell: chris.greenwell@durham.ac.uk      Telephone: +44(0)191 334 2324

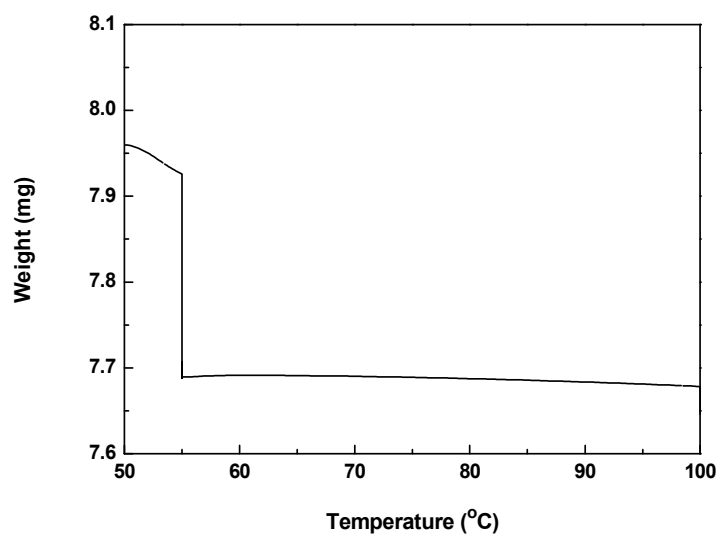

Figure S1. TGA results of cellulosic polyurethane (weight vs temperature).

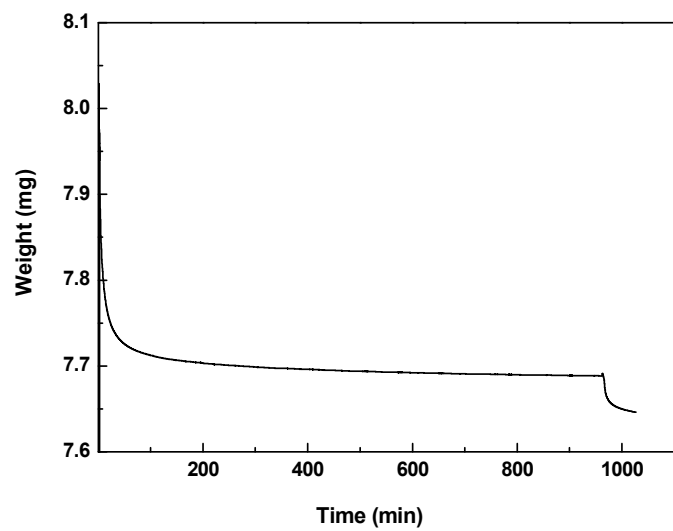

Figure S2. TGA results of cellulosic polyurethane (weight vs time).
